# Supplementary material for: Transcription Factor WRKY33 Mediates the Phosphate Deficiency-Induced Remodeling of Root Architecture by Modulating Iron Homeostasis in Arabidopsis Roots
Source: MDPI journal article supplement (doi:10.3390/ijms22179275), 2021-08-27
Supplement: s1 [file s1]

## Supplementary datas

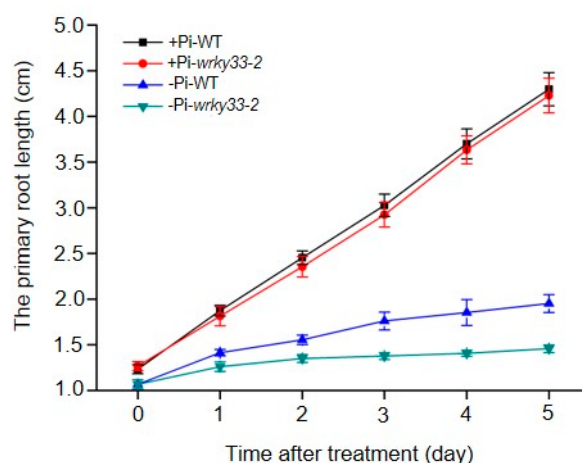

**Supplementary figure S1.** Root length of WT and *wrky33-2* grown on +Pi or -Pi medium for 5 days. Seedlings were germinated on 1/2 MS agar medium and 4-day-old seedlings were transferred to +Pi or -Pi medium for another 5 days. Data are means  $\pm$  SD from three independent experiments ( $n = 8$ ,  $n$  represents the number of samples).

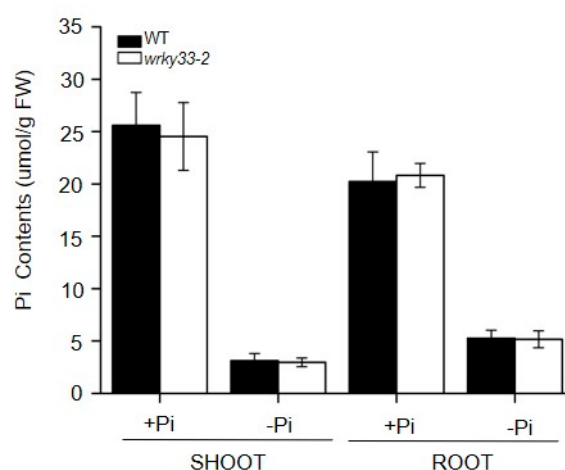

**Supplementary figure S2.** Pi content in roots and shoot of WT and *wrky33-2* mutant. Six-day-old seedlings grown on +Pi or -Pi medium for another 6 days. Roots and shoots were harvested separately for Pi content determination. Data are means  $\pm$  SD of three replicate experiments.

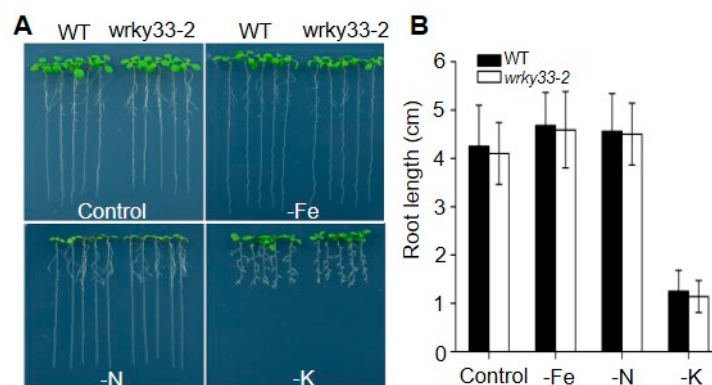

**Supplementary figure S3.** The seedlings growth under nitrogen(N), potassium(K), and Iron (Fe) deficient conditions. (A)The growth phenotypes of WT and *wrky33-2* mutants. Four-day-old seedlings were transferred to -N, -K, or -Fe medium for 6 days. (B) The statistical analysis of the primary root length as indicated in (A). Data are means  $\pm$  SD from three independent experiments (n=15, n represents the number of samples).

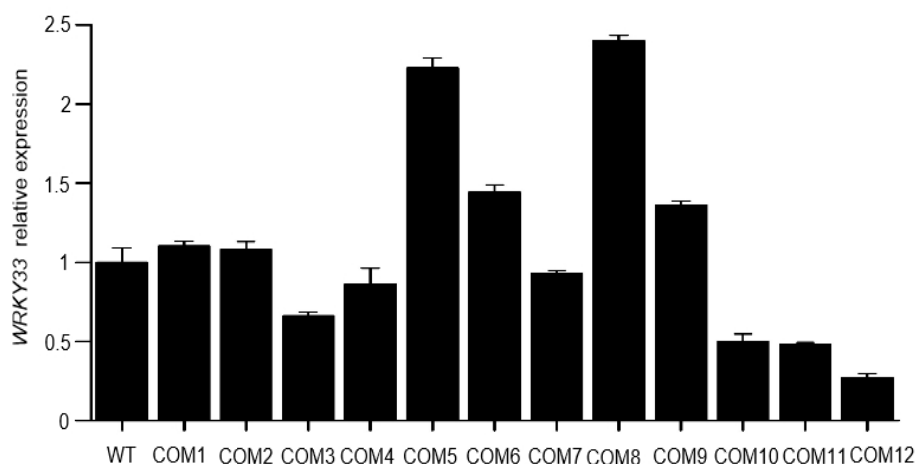

**Supplementary figure S4.** qRT-PCR analysis of *WRKY33* expression in transgenic plants. 7-day-old plants were excised for RNA extraction and qRT-PCR analysis. *ACTIN2* was used as an internal standard. Data are mean  $\pm$  SD from three independent experiments.

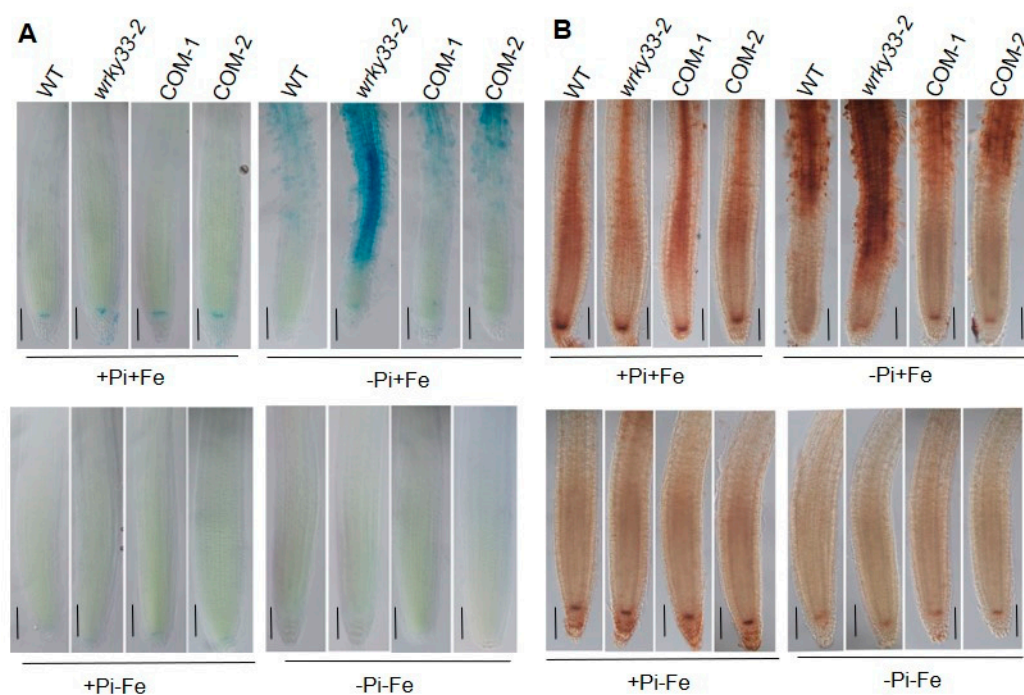

**Supplementary figure S5.** Pi deficiency-induced Fe accumulation in root tips depended on the presence of Fe in the medium. (A-B) Fe staining by Perls (A) and Perls/DAB (B). Four-day-old seedlings of WT, *wrky33-2* and complementation lines grown on +Pi+Fe, -Pi+Fe, +Pi-Fe and -Pi-Fe medium for 3 days. Bar=50um.

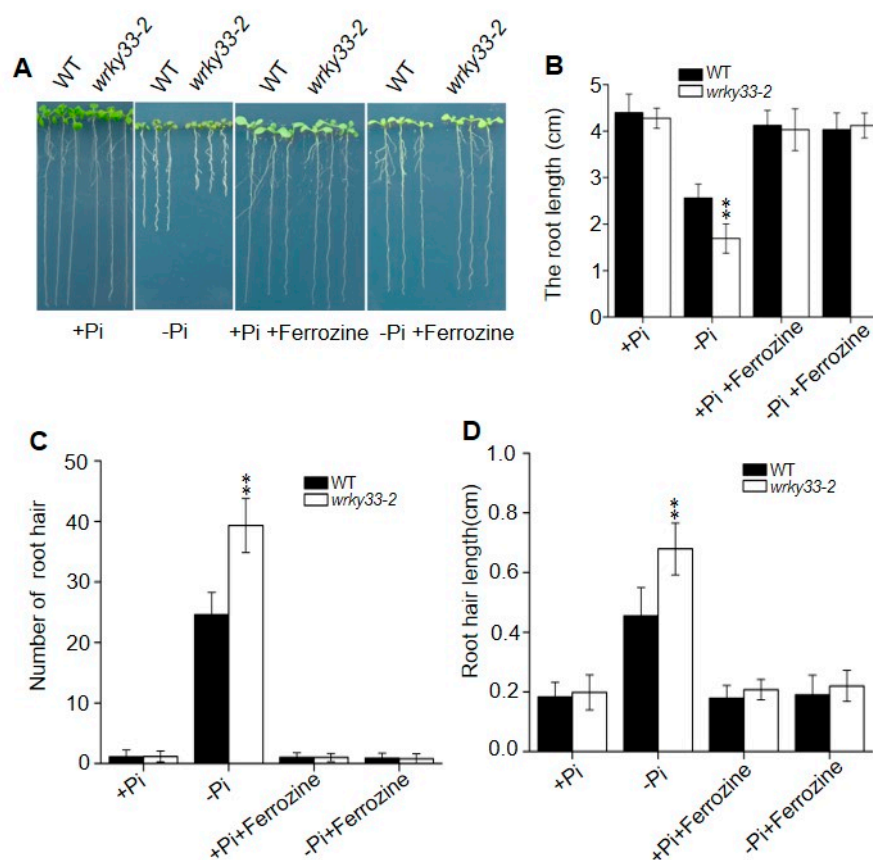

**Supplementary figure S6.** Ferrozine alleviates Pi deficiency-induced root growth inhibition. **(A)** 4-day-old seedlings of WT and *wrky33-2* were transferred to +Pi and -Pi medium supplemented with 200  $\mu$ M ferrozine for 6 days. **(B)** The statistical analysis of the primary root length in **(A)**. Data are means  $\pm$  SD from 3 independent experiments ( $n = 15$ ). The root hair number **(C)** and root hair length **(D)**. Four-day-old seedlings of WT and *wrky33-2* grown on +Pi and -Pi medium supplemented with 200  $\mu$ M ferrozine for 3 days. Data are means  $\pm$ SD from three independent experiments ( $n = 15$ ,  $n$  represents the number of samples). Asterisks in **(B)**, **(C)** and **(D)** indicate a significant difference from the WT (Tukey's test; \*\*,  $P < 0.01$ ).

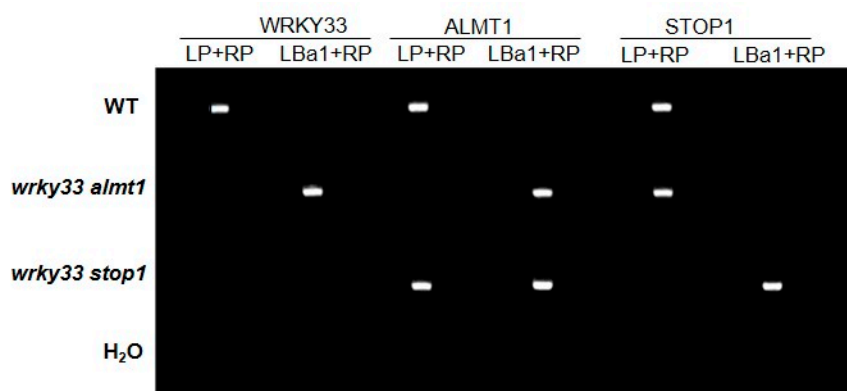

**Supplementary figure S7.** The identification of *wrky33 almt1* and *wrky33 stop1* double mutant. Confirmation of the T-DNA insertion in the *wrky33 almt1* and *wrky33 stop1* double mutant by PCR.

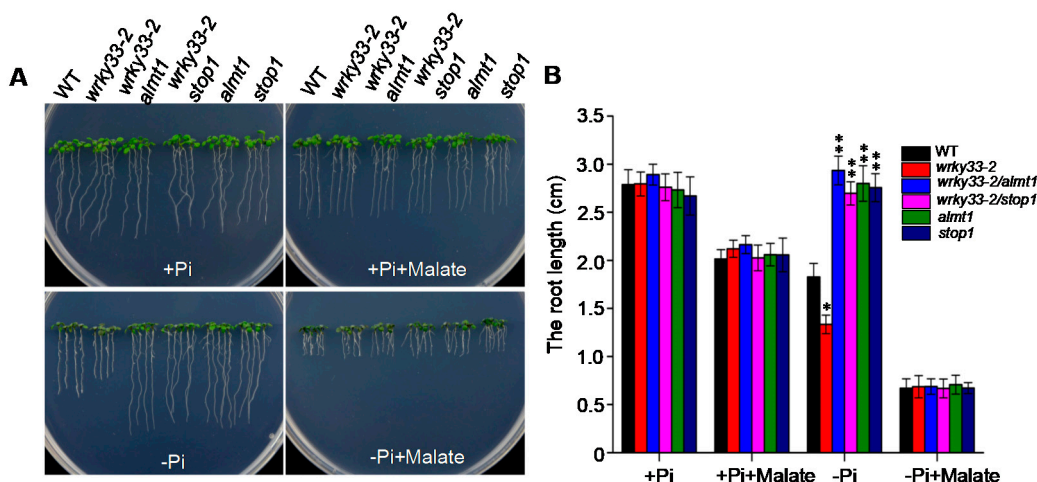

**Supplementary figure S8.** Effect of malate on the root growth under Pi deficiency condition. (A) The growth phenotype of WT, *wrky33-2*, *wrky33-2 almt1*, *wrky33-2 stop1*, *almt1* and *stop1* seedlings. Four-day-old seedlings were transferred to +Pi or -Pi medium supplemented with or without 1 mM malate for 6 days. (B) The statistical analysis of the primary root length in (A). Data are means  $\pm$ SD from three independent experiments ( $n = 15$ ,  $n$  represents the number of samples). Asterisks in (B) indicate a significant difference from the WT (Tukey's test; \*,  $P < 0.05$ ; \*\*,  $P < 0.01$ ).

**Supplementary Table S1**

## Primers used in this study

| Primer name                          | Primer sequences (5'-3')      |
|--------------------------------------|-------------------------------|
| <b>(1) qRT-PCR analyze</b>           |                               |
| <i>Actin2</i> -F                     | CTGTTCTCTCCTTGTACGCCAGT       |
| <i>Actin2</i> -R                     | CGGGTAATTCATAGTTCTTCTCGAT     |
| <i>WRKY33</i> -F                     | CCATCGGTTGTCCAGTGAGG          |
| <i>WRKY33</i> -R                     | GCTCTGTTTGTGGCGTAACC          |
| <i>ALMT1</i> -F                      | ACTTGAGAGAGCTGAGTGACC         |
| <i>ALMT1</i> -R                      | TCTTCTCGGGTCTTCATTCCC         |
| <i>STOP1</i> -F                      | CCAAGTTCCATCTCAAGCTTTTCT      |
| <i>STOP1</i> -R                      | TGGGACGTAAAACCTGCGAA          |
| <b>(2) Construction vector</b>       |                               |
| <i>WRKY33</i> -COM-F                 | AACTGCAGGCCAAAGGGTGTTGTTATTGA |
| <i>WRKY33</i> -COM-R                 | CGGGATCCTCAGGGCATAAACGAATCGA  |
| <b>(4) Identification of mutants</b> |                               |
| LBa1                                 | TGGTTCACGTAGTGGGCCATCG        |
| GABI                                 | GGGCTACACTGAATTGCTAGCTC       |
| <i>wrky33-2</i> -LP                  | ATGTCAGGTC TCGAAGATAT         |
| <i>wrky33-2</i> -RP                  | CTACACAGTG TAGTGATGTC         |
| <i>almt1</i> -LP                     | AGTGAGAGAA GGGATTAGAGTAGG     |
| <i>almt1</i> -RP                     | GGCAACATGA TGACATGAGTC        |
| <i>stop1</i> -LP                     | AAGACGATTT GTGCAACACC         |
| <i>stop1</i> -RP                     | CAGACTCACC AACATTCCTG         |
